# Supplementary material
Source: PubMed Central journal article supplement (PMC3030248)
Supplement: mmc1.pdf [file mmc1.pdf]

# **Mechanisms of protein-ligand association and its modulation by protein mutations**

Martin Held<sup>1, 4</sup>, Philipp Metzner<sup>2, 3</sup>, Jan-Hendrik Prinz<sup>1, 3</sup>, Frank Noé<sup>1, 3</sup>

<sup>1</sup>Freie Universität Berlin, Arnimallee 6, 14195 Berlin, Germany

<sup>2</sup>University of Lugano, Via Giuseppe Buffi 13, 6900 Lugano, Switzerland <sup>3</sup>DFG Research Center MATHEON

<sup>4</sup>IMPRS-CBSC

## Supplement

### Calculated Association Rates

| Mutant       | Net Charge [ $e$ ] | $k_{\text{on}}$ [ $10^8 M^{-1} s^{-1}$ ] | $k_{\text{on}}$ [ $10^8 M^{-1} s^{-1}$ ]<br>Huang and Briggs<br>[Biopolymers, 63, 2002] |
|--------------|--------------------|------------------------------------------|-----------------------------------------------------------------------------------------|
| wt (modeled) | 0                  | 27.9                                     | 28.3                                                                                    |
| A197W        | 0                  | 26.4                                     | 25.0                                                                                    |
| D56N         | +1                 | 73.9                                     | 80.1                                                                                    |
| D137T        | +1                 | 77.8                                     | 105.4                                                                                   |
| T141D        | -1                 | 1.6                                      | 7.6                                                                                     |
| R135Q        | -1                 | 5.9                                      | 1.6                                                                                     |
| K43M         | -1                 | 11.3                                     | 7.6                                                                                     |
| K43Q         | -1                 | 11.4                                     | 5.7                                                                                     |
| R134Q        | -1                 | 12.4                                     | 12.5                                                                                    |
| <i>3mut</i>  | -3                 | 2.5                                      | 1.7                                                                                     |
| <i>6mut</i>  | 0                  | 9.3                                      | 8.8                                                                                     |
| PBP: $P_1$   | -2                 | 3.0                                      |                                                                                         |

Table 1: Net charge and computed bimolecular association rates of considered mutant structures at ionic strength of  $0mM$ .

### Association Free Energy Profiles, First Hitting Densities, Association Pathways, Mutation Sites

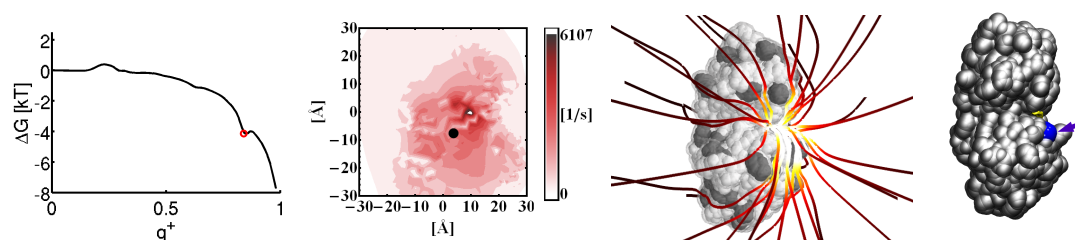

Figure 2: Mutant D137T - Committor Free Energy Profile, First Hitting Density, Association Pathways, Mutation Site

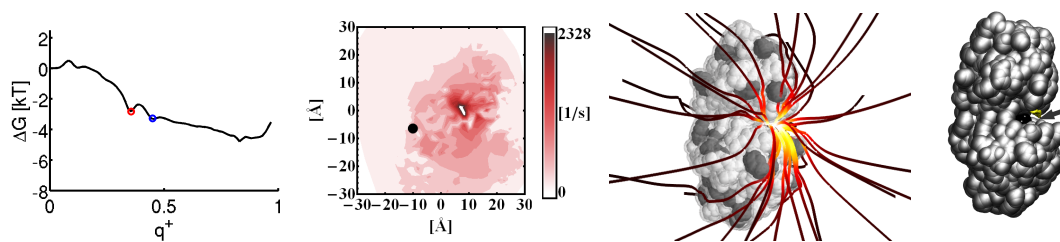

Figure 1: Mutant A197W - Committor Free Energy Profile, First Hitting Density, Association Pathways, Mutation Site

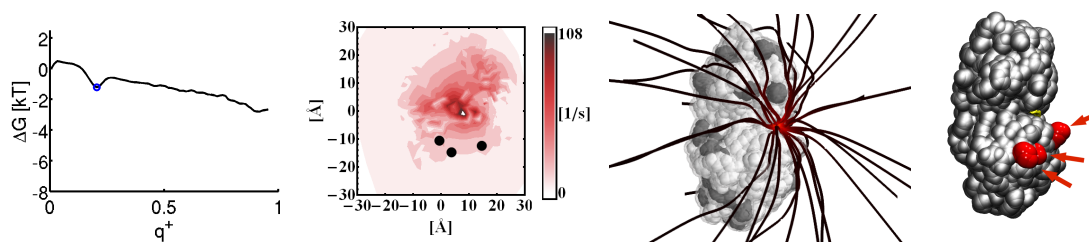

Figure 3: Mutant 3 mut. - Committor Free Energy Profile, First Hitting Density, Association Pathways, Mutation Site

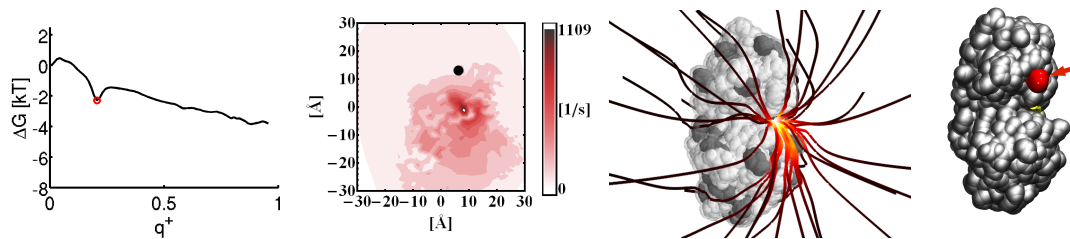

Figure 4: Mutant K43Q. - Committor Free Energy Profile, First Hitting Density, Association Pathways, Mutation Site

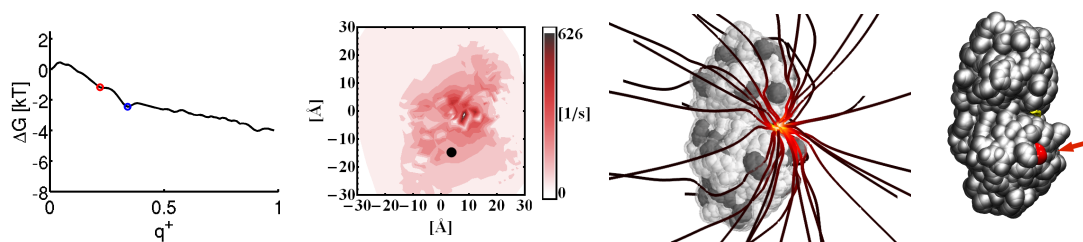

Figure 5: Mutant R134Q. - Committor Free Energy Profile, First Hitting Density, Association Pathways, Mutation Site

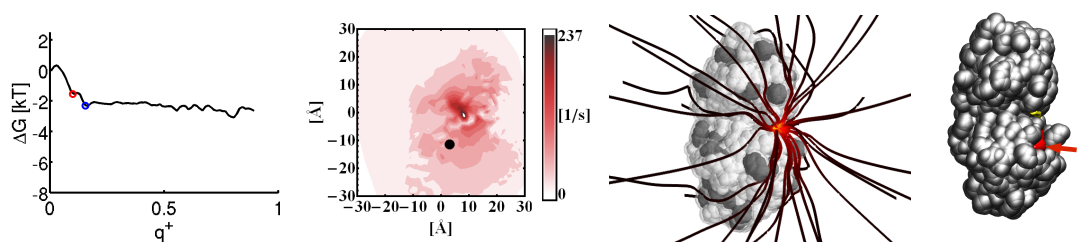

Figure 6: Mutant R135Q. - Committor Free Energy Profile, First Hitting Density, Association Pathways, Mutation Site
